# Supplementary material for: Proteome Profiling of Developing Murine Lens Through Mass Spectrometry
Source: PubMed Central journal article supplement — Invest Ophthalmol Vis Sci. 2018 Jan;59(1):100–7. doi: 10.1167/iovs.17-21601 (PMC5769801; doi:10.1167/iovs.17-21601), 2018-01
Supplement: iovs-58-13-55_s22.pdf [file iovs-58-13-55_s22.pdf]

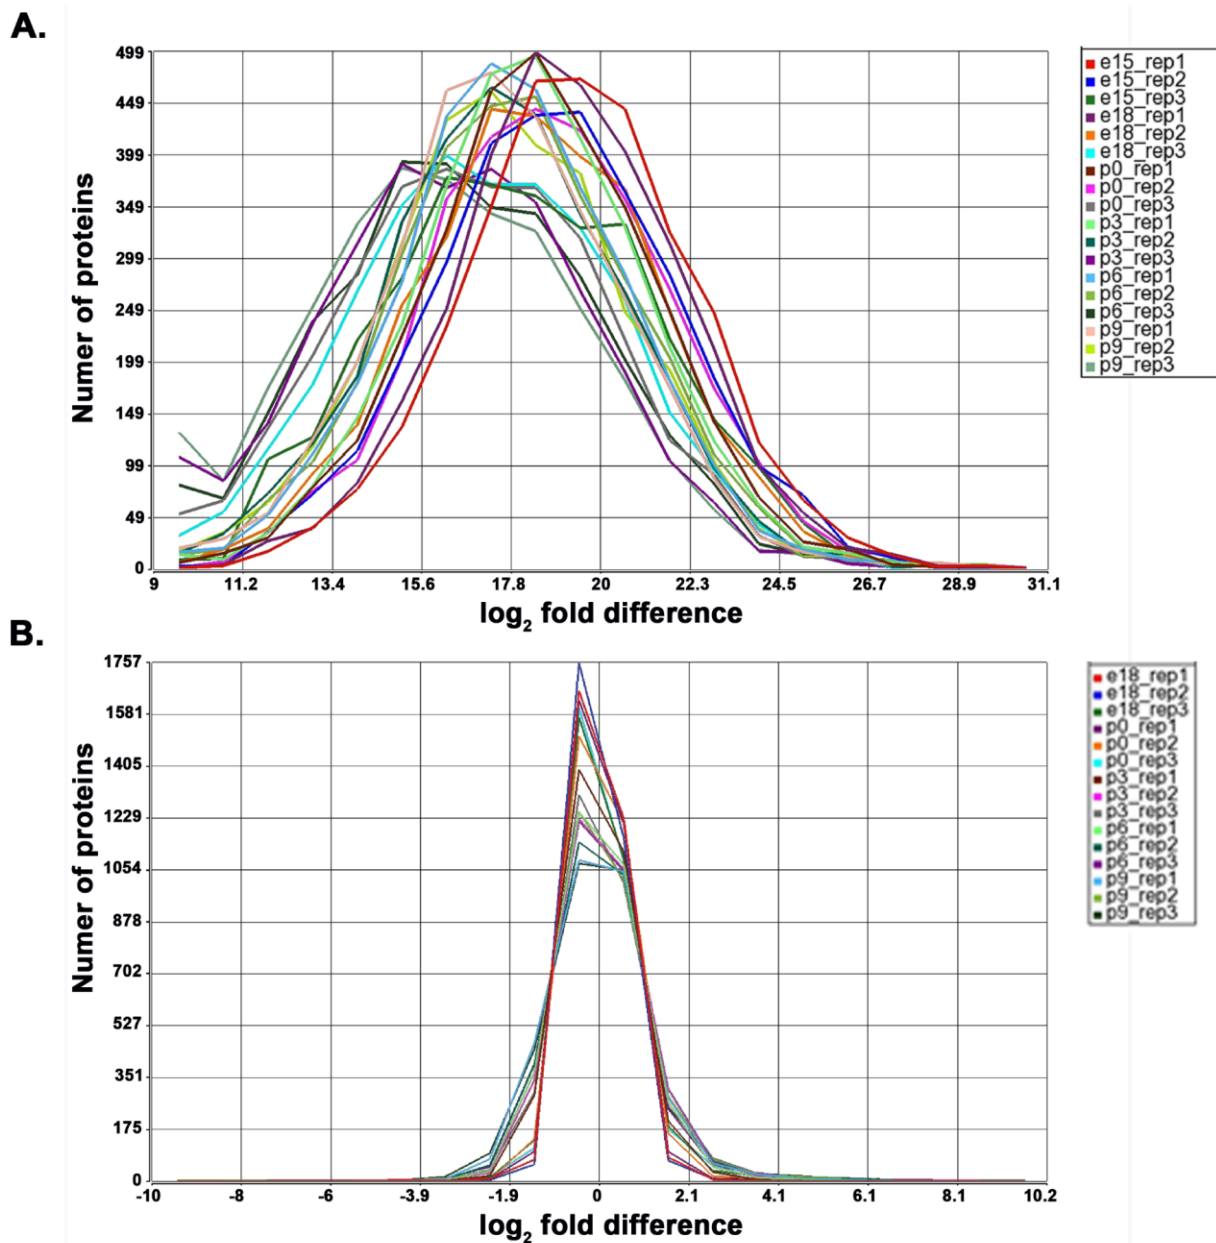

**Supplementary Figure 2:** Sample histograms illustrating the distribution of non-normalized (A) and E15-normalized (B) reporter ion intensities in all three TMT sets. The x-axis represents fold difference in non-normalized and normalized reporter ion intensities in A and B, respectively while the y-axis depicts the number of proteins.
